# Supplementary material for: Pragmatic Replication Trial of Health Promotion Coaching for Obesity in Serious Mental Illness and Maintenance of Outcomes
Source: Atypon-hosted journal article supplement (doi:10.1176/appi.ajp.2014.14030357), 2014-12-17

**TABLE S1. Additional Baseline Clinical Characteristics of Participants in the In SHAPE and Fitness Club Membership Groups<sup>a</sup>**

| Characteristic                                                     | Total Sample (N=210) |    | Fitness Club Membership (N=106) |    | In SHAPE (N=104) |    |
|--------------------------------------------------------------------|----------------------|----|---------------------------------|----|------------------|----|
|                                                                    | N                    | %  | N                               | %  | N                | %  |
| Weight in lbs (M±SD)                                               | 235.4±54.1           |    | 238.9±57.9                      |    | 231.8±50.1       |    |
| Body Mass Index (M±SD)                                             | 36.8±8.2             |    | 37.5±8.8                        |    | 36.2±7.5         |    |
| Obese (BMI≥30)                                                     | 166                  | 79 | 82                              | 77 | 84               | 81 |
| Very Severely Obese (BMI≥40)                                       | 65                   | 31 | 36                              | 34 | 29               | 28 |
| Waist circumference in inches (M±SD)                               | 46.9±7.2             |    | 47.8±7.5                        |    | 46.0±6.7         |    |
| Average number of psychotropic medications (M±SD)                  | 2.05±1.10            |    | 1.92±1.10                       |    | 2.06±1.08        |    |
| Use of medications with high weight gain propensity <sup>b</sup>   | 54                   | 26 | 20                              | 22 | 29               | 33 |
| Use of medications with medium weight gain propensity <sup>c</sup> | 88                   | 42 | 49                              | 46 | 39               | 38 |
| Use of medications with low weight gain propensity <sup>d</sup>    | 46                   | 22 | 27                              | 26 | 19               | 18 |
| Risk of Hypertension <sup>e</sup>                                  | 81                   | 39 | 42                              | 40 | 39               | 38 |
| Systolic Blood Pressure (M±SD)                                     | 130.17±19.14         |    | 131.97±17.70                    |    | 128.39±20.40     |    |
| Elevated Systolic Blood Pressure <sup>f</sup>                      | 62                   | 30 | 32                              | 30 | 30               | 29 |
| Diastolic Blood Pressure (M±SD)                                    | 81.88±12.03          |    | 84.13±10.93                     |    | 79.65±12.69      |    |
| Elevated Diastolic Blood Pressure <sup>g</sup>                     | 49                   | 23 | 25                              | 24 | 24               | 23 |
| Total Cholesterol (M±SD)                                           | 174.88±46.50         |    | 179.02±48.71                    |    | 170.64±43.96     |    |
| Elevated Total Cholesterol <sup>h</sup>                            | 60                   | 29 | 31                              | 29 | 29               | 28 |
| HDL (M±SD)                                                         | 43.72±15.84          |    | 44.55±16.02                     |    | 42.88±15.68      |    |
| Low HDL <sup>i</sup>                                               | 125                  | 60 | 61                              | 58 | 64               | 62 |
| LDL (M±SD)                                                         | 100.85±36.83         |    | 104.94±35.80                    |    | 96.76±37.59      |    |
| Elevated LDL <sup>j</sup>                                          | 39                   | 19 | 22                              | 21 | 17               | 16 |
| Triglycerides (M±SD)                                               | 163.94±112.65        |    | 161.85±113.81                   |    | 166.05±111.98    |    |
| Elevated Triglycerides <sup>k</sup>                                | 87                   | 41 | 43                              | 41 | 44               | 42 |

<sup>a</sup>Means were compared by t tests, and proportions were compared by chi square tests.

<sup>b</sup>High weight gain propensity medications include: olanzapine, clozapine

<sup>c</sup>Medium weight gain propensity medications include: haloperidol, risperidone, quetiapine, thioridazine, chlorpromazine, paroxetine, amitriptyline, divalproex, valproate, doxepin, lithium, carbamazepine, imipramine, gabapentin

<sup>d</sup>Low weight gain propensity medications include: ziprasidone, perphenazine, fluphenazine, fluoxetine, bupropion, venlafaxine, molindone, lamotrigine, duloxetine, aripiprazole, fluvoxamine, trazodone, desipramine, loxapine, sertraline, escitalopram, clomipramine, nortriptyline, citalopram, paliperidone, topiramate, mirtazapine, lurasidone

<sup>e</sup>Risk of hypertension was defined as systolic > 140 and diastolic > 90

<sup>f</sup>Elevated systolic blood pressure was defined as > 140

<sup>g</sup>Elevated diastolic blood pressure was defined as > 90

<sup>h</sup>Elevated cholesterol was defined as total cholesterol ≥ 200

<sup>i</sup>Low HDL was defined as ≤ 40 in women and ≤ 50 in men

<sup>j</sup>Elevated LDL was defined as ≥ 130

<sup>k</sup>Elevated triglycerides was defined as ≥ 150

**TABLE S2. Maintenance of Primary Weight and Fitness Outcomes, and Secondary Outcomes Between In SHAPE and Fitness Club Membership (FCM) Groups From 12 to 18 Months**

| Outcome                                         | Group    | 12-Month |        | 18-Month |        | Group by Time Effect (12-18 Months) <sup>a</sup> |       |      |
|-------------------------------------------------|----------|----------|--------|----------|--------|--------------------------------------------------|-------|------|
|                                                 |          | M        | SD     | M        | SD     | df                                               | F     | p    |
| <b>Primary Weight and Fitness Outcomes</b>      |          |          |        |          |        |                                                  |       |      |
| Weight (lbs.)                                   | In SHAPE | 226.5    | 48.8   | 228.7    | 53.0   | 1, 145                                           | .608  | .437 |
|                                                 | FCM      | 239.6    | 61.9   | 234.1    | 62.4   |                                                  |       |      |
| Cardiorespiratory Fitness 6 MWT Distance (feet) | In SHAPE | 1385.3   | 275.4  | 1307.4   | 269.9  | 1, 133                                           | 2.605 | .109 |
|                                                 | FCM      | 1247.3   | 319.4  | 1239.4   | 258.9  |                                                  |       |      |
| <b>Secondary Outcomes</b>                       |          |          |        |          |        |                                                  |       |      |
| BMI                                             | In SHAPE | 35.0     | 7.1    | 35.5     | 7.7    | 1, 145                                           | .850  | .358 |
|                                                 | FCM      | 37.4     | 9.6    | 36.5     | 9.4    |                                                  |       |      |
| Waist Circumference (inches)                    | In SHAPE | 44.3     | 6.6    | 44.1     | 7.1    | 1, 147                                           | .724  | .396 |
|                                                 | FCM      | 46.1     | 7.6    | 44.6     | 7.7    |                                                  |       |      |
| Exercise Minutes                                | In SHAPE | 99.8     | 135.0  | 130.2    | 204.3  | 1, 161                                           | .623  | .431 |
|                                                 | FCM      | 148.9    | 224.3  | 124.6    | 250.8  |                                                  |       |      |
| IPAQ Total Vigorous Score (Log of MET min)      | In SHAPE | 379.8    | 890.8  | 331.7    | 1110.5 | 1, 167                                           | .220  | .640 |
|                                                 | FCM      | 433.7    | 1080.1 | 382.2    | 1938.4 |                                                  |       |      |
| Readiness to Change Dietary Behaviors           | In SHAPE | 3.7      | 0.7    | 3.6      | 0.6    | 1, 154                                           | 5.150 | .025 |
|                                                 | FCM      | 3.4      | 0.6    | 3.6      | 0.6    |                                                  |       |      |
| <b>Secondary Dietary Behavior Outcomes</b>      |          |          |        |          |        |                                                  |       |      |
| Total calories <sup>b</sup>                     | In SHAPE | 1893     | 907    | 1704     | 835    | 1, 143                                           | .111  | .740 |
|                                                 | FCM      | 1787     | 967    | 1681     | 839    |                                                  |       |      |
| % calories fat <sup>b</sup>                     | In SHAPE | 37.9     | 7.6    | 36.6     | 7.3    | 1, 147                                           | .028  | .867 |
|                                                 | FCM      | 36.8     | 7.9    | 35.9     | 8.2    |                                                  |       |      |
| % calories sweets <sup>b</sup>                  | In SHAPE | 9.7      | 10.8   | 12.1     | 13.1   | 1, 149                                           | 1.177 | .280 |
|                                                 | FCM      | 9.7      | 10.0   | 9.8      | 11.6   |                                                  |       |      |
| Fruit servings/day <sup>b</sup>                 | In SHAPE | 1.3      | 0.9    | 1.2      | 1.0    | 1, 140                                           | .043  | .836 |
|                                                 | FCM      | 1.3      | 1.0    | 1.2      | 1.0    |                                                  |       |      |

|                                                          |                 |       |       |       |      |        |       |      |
|----------------------------------------------------------|-----------------|-------|-------|-------|------|--------|-------|------|
| Veg. servings/day <sup>b</sup>                           | <b>In SHAPE</b> | 3.6   | 2.8   | 3.0   | 2.6  | 1, 138 | 3.408 | .067 |
|                                                          | <b>FCM</b>      | 3.3   | 3.4   | 3.7   | 4.0  |        |       |      |
| <b>Secondary Blood Pressure and Serum Lipid Outcomes</b> |                 |       |       |       |      |        |       |      |
| Systolic Blood Pressure                                  | <b>In SHAPE</b> | 130.6 | 17.3  | 135.1 | 22.9 | 1, 157 | .526  | .469 |
|                                                          | <b>FCM</b>      | 130.3 | 18.2  | 132.5 | 18.9 |        |       |      |
| Diastolic Blood Pressure                                 | <b>In SHAPE</b> | 80.0  | 12.2  | 83.1  | 15.2 | 1, 154 | 7.718 | .006 |
|                                                          | <b>FCM</b>      | 84.4  | 11.4  | 80.7  | 11.9 |        |       |      |
| Total Cholesterol                                        | <b>In SHAPE</b> | 166.3 | 42.8  | 165.3 | 40.0 | 1, 151 | .018  | .894 |
|                                                          | <b>FCM</b>      | 172.9 | 42.7  | 174.4 | 43.2 |        |       |      |
| HDL                                                      | <b>In SHAPE</b> | 49.2  | 17.2  | 50.5  | 19.2 | 1, 148 | .123  | .726 |
|                                                          | <b>FCM</b>      | 48.4  | 17.2  | 51.5  | 20.2 |        |       |      |
| LDL                                                      | <b>In SHAPE</b> | 89.8  | 34.9  | 88.6  | 30.6 | 1, 130 | .115  | .735 |
|                                                          | <b>FCM</b>      | 96.8  | 34.8  | 94.3  | 33.3 |        |       |      |
| Triglycerides                                            | <b>In SHAPE</b> | 156.1 | 108.0 | 156.1 | 94.3 | 1, 154 | .399  | .528 |
|                                                          | <b>FCM</b>      | 158.3 | 103.9 | 144.5 | 97.7 |        |       |      |

<sup>a</sup>Means shown in table consist of raw (unadjusted) means.

<sup>b</sup>Block Food Frequency Questionnaire

**FIGURE S1. Study CONSORT Diagram**

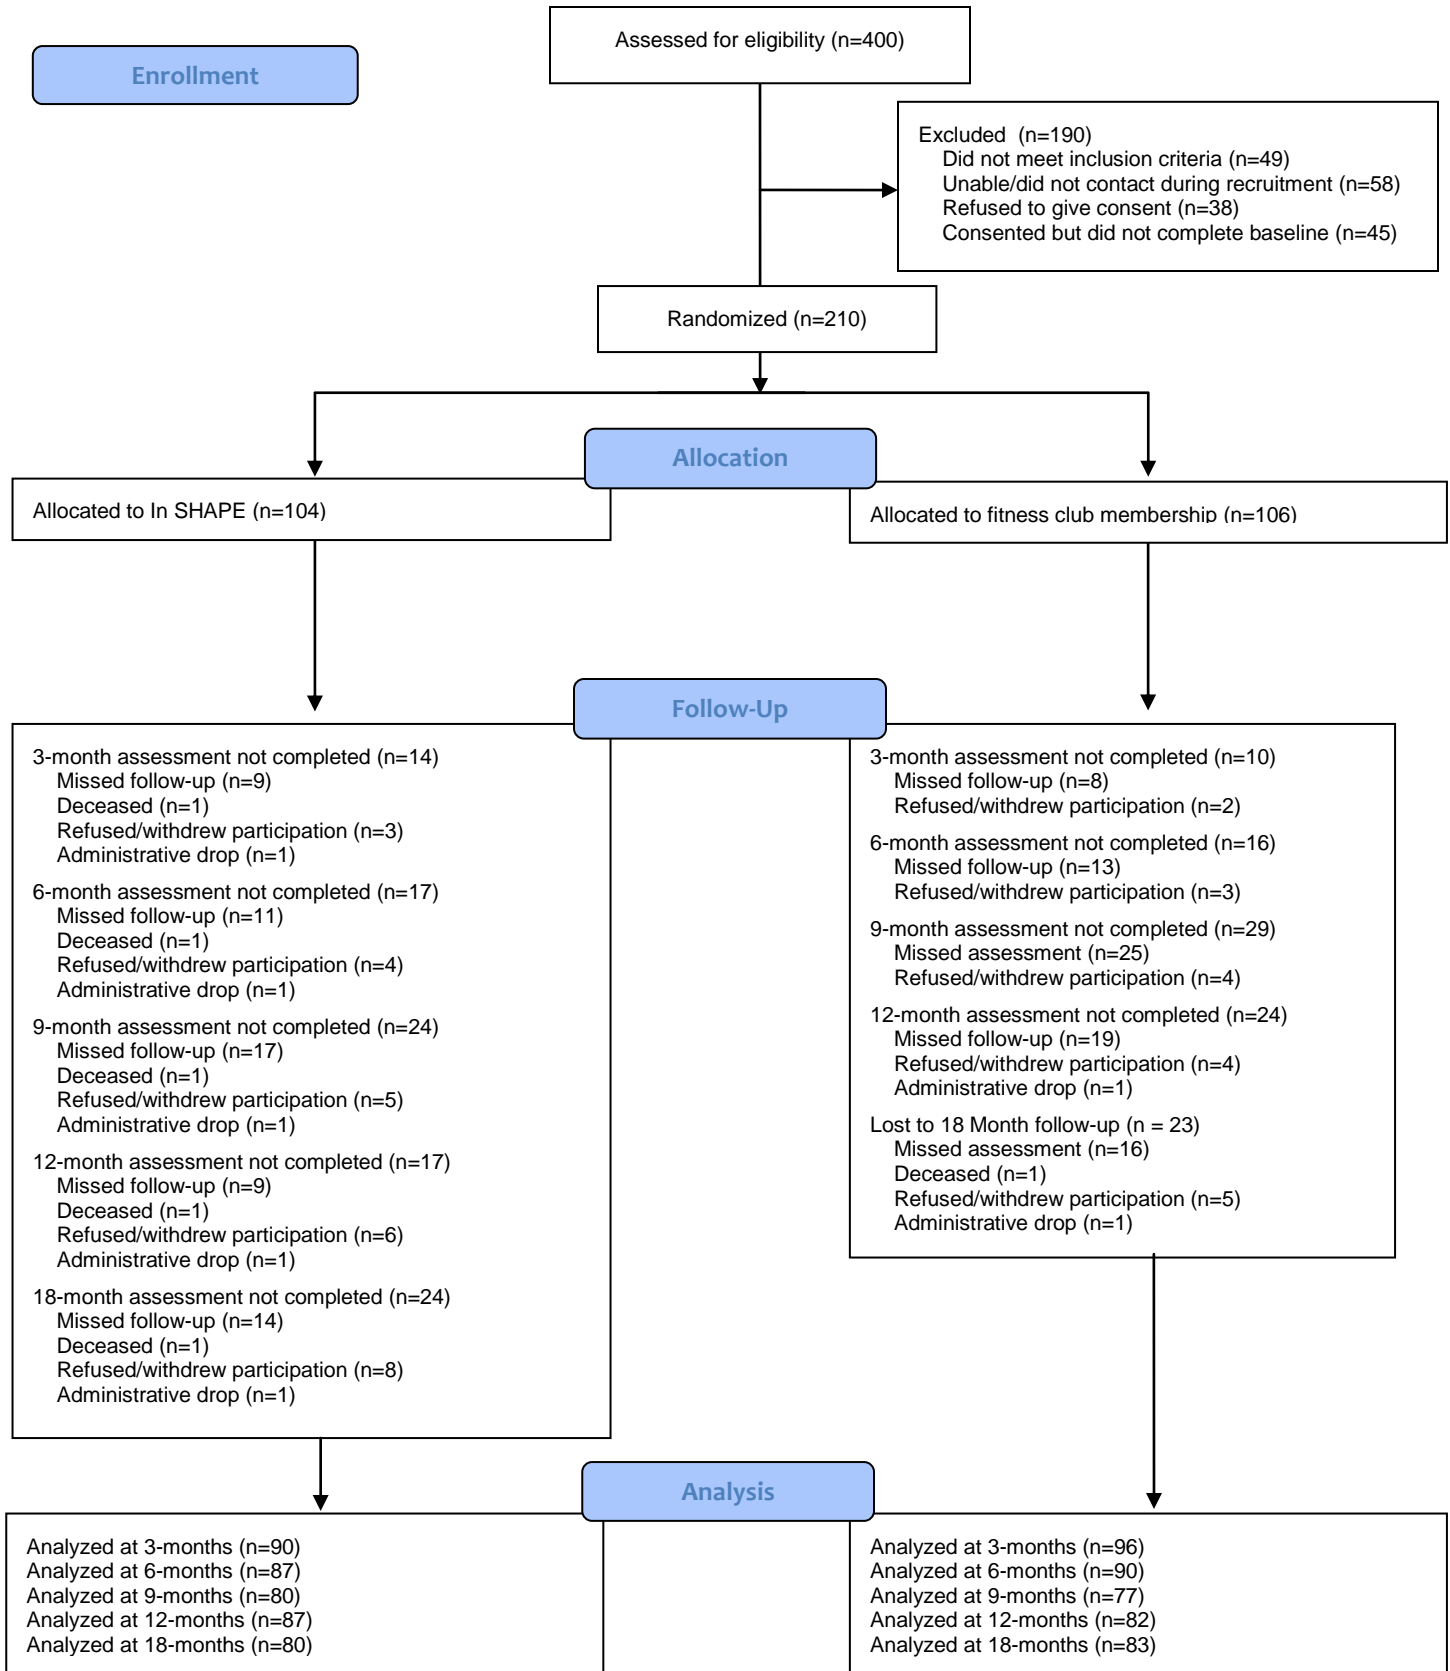

Supplement: appi.ajp.2014.14030357.ds001.pdf [file appi.ajp.2014.14030357.ds001.pdf]
